# Supplementary material for: MIR155HG is a prognostic biomarker and associated with immune infiltration and immune checkpoint molecules expression in multiple cancers
Source: PubMed Central journal article supplement (PMC6885872; doi:10.1002/cam4.2583), 2019-09-30
Supplement: CAM4-8-7161-s001.pdf [file CAM4-8-7161-s001.pdf]

## Supplementary Materials:

**TABLE S1** List of primer used in Real-time RT-PCR of the present study

| Gene names | Sequences (5'→3')         |
|------------|---------------------------|
| MIR155HG-F | GTCCCAAATCTAGGTTCAAGTTCA  |
| MIR155HG-R | TCTCTATCTCATCTAAGCCTCACAA |
| CD274-1F   | GCCGAAGTCATCTGGACAAG      |
| CD274-1R   | AGTTGTTGTGTTGATTCTCAGTGT  |
| CTLA4-F    | CATGATGGGGAATGAGTTGACC    |
| CTLA4-R    | TCAGTCCTTGGATAGTGAGGTTT   |
| GAPDH-F    | AGGGCTGCTTTTAACTCTGGT     |
| GAPDH-R    | TCTCGCTCCTGGAAGATGGTG     |

**TABLE S2** Correlation of *MIR155HG* mRNA expression and clinical prognosis, pathological stage in 33 types of cancer

| Types of cancer | Overall survival |        |                 |          |                 | Disease free survival |        |                |          |                | Pathological stage |                 |
|-----------------|------------------|--------|-----------------|----------|-----------------|-----------------------|--------|----------------|----------|----------------|--------------------|-----------------|
|                 | n(high)          | n(low) | Logrank         |          |                 | Logrank p             |        |                | F        |                |                    |                 |
|                 |                  |        | p               | HR(high) | p(HR)           | n(high)               | n(low) |                | HR(high) | p(HR)          | value              | Pr(>F)          |
| ACC             | 38               | 29     | 0.29            | 1.6      | 0.29            | 38                    | 29     | 0.63           | 1.2      | 0.64           | 1.05               | 0.377           |
| BLCA            | 198              | 199    | 0.98            | 0.99     | 0.97            | 198                   | 199    | 0.6            | 0.91     | 0.6            | 2.19               | 0.114           |
| BRCA            | 533              | 533    | 0.33            | 0.85     | 0.33            | 533                   | 533    | 0.8            | 1        | 0.8            | 1.98               | 0.0953          |
| CESC            | 144              | 146    | 0.13            | 0.7      | 0.13            | 144                   | 146    | 0.13           | 0.64     | 0.13           | 0.975              | 0.405           |
| CHOL            | 18               | 18     | <b>0.0082</b>   | 0.27     | <b>0.013</b>    | 18                    | 18     | <b>0.0078</b>  | 0.27     | <b>0.012</b>   | 0.503              | 0.609           |
| COAD            | 134              | 131    | 0.4             | 1.2      | 0.4             | 134                   | 131    | 0.68           | 1.1      | 0.68           | 0.27               | 0.847           |
| DLBC            | 23               | 23     | 0.36            | 1.9      | 0.37            | 23                    | 23     | 0.1            | 2.9      | 0.12           | 0.523              | 0.669           |
| ESCA            | 91               | 91     | 0.38            | 1.2      | 0.38            | 91                    | 91     | 0.62           | 1.1      | 0.61           | 1.64               | 0.181           |
| GBM             | 81               | 81     | <b>0.016</b>    | 1.6      | <b>0.015</b>    | 81                    | 81     | 0.07           | 1.5      | 0.075          | -                  | -               |
| HNSC            | 254              | 257    | <b>0.027</b>    | 0.74     | <b>0.027</b>    | 254                   | 257    | 0.98           | 0.99     | 0.97           | 0.0458             | 0.987           |
| KICH            | 26               | 32     | 0.6             | 0.69     | 0.6             | 26                    | 32     | 0.71           | 1.3      | 0.71           | 3.95               | <b>0.0122</b>   |
| KIRC            | 258              | 256    | <b>0.0018</b>   | 1.6      | <b>0.002</b>    | 258                   | 256    | 0.16           | 1.3      | 0.17           | 9.21               | <b>6.10E-06</b> |
| KIRP            | 141              | 140    | 0.31            | 1.4      | 0.31            | 141                   | 140    | 0.5            | 1.2      | 0.5            | 0.415              | 0.742           |
| LAML            | 53               | 53     | 0.15            | 1.5      | 0.15            | 53                    | 53     | 1              | 1        | NaN            | -                  | -               |
| LGG             | 248              | 252    | <b>5.40E-08</b> | 2.7      | <b>1.60E-07</b> | 248                   | 252    | <b>0.00048</b> | 1.7      | <b>0.00057</b> | -                  | -               |
| LIHC            | 178              | 174    | 0.87            | 1        | 0.86            | 178                   | 174    | 0.54           | 1.1      | 0.54           | 0.485              | 0.693           |
| LUAD            | 238              | 239    | <b>0.025</b>    | 0.71     | <b>0.026</b>    | 238                   | 239    | 0.88           | 0.98     | 0.88           | 3.1                | <b>0.0267</b>   |
| LUSC            | 241              | 237    | 0.93            | 0.99     | 0.94            | 241                   | 237    | 0.69           | 0.93     | 0.69           | 0.816              | 0.485           |
| MESO            | 41               | 41     | 0.12            | 1.5      | 0.11            | 41                    | 41     | 0.55           | 1.2      | 0.55           | -                  | -               |
| OV              | 209              | 208    | 0.11            | 0.82     | 0.11            | 209                   | 208    | 0.78           | 0.97     | 0.78           | 0.667              | 0.514           |
| PAAD            | 89               | 89     | 0.55            | 0.88     | 0.56            | 89                    | 89     | 0.65           | 1.1      | 0.66           | 1.54               | 0.206           |
| PCPG            | 91               | 91     | 0.73            | 0.75     | 0.73            | 91                    | 91     | 0.55           | 0.74     | 0.55           | -                  | -               |
| PRAD            | 240              | 244    | 0.81            | 0.86     | 0.82            | 240                   | 244    | 0.2            | 1.3      | 0.2            | -                  | -               |
| READ            | 46               | 46     | 0.44            | 0.69     | 0.45            | 46                    | 46     | 0.4            | 1.5      | 0.41           | 0.906              | 0.442           |
| SARC            | 131              | 131    | 0.4             | 1.2      | 0.4             | 131                   | 131    | 0.44           | 1.1      | 0.44           | -                  | -               |
| SKCM            | 228              | 229    | <b>7.40E-06</b> | 0.54     | <b>1.00E-05</b> | 228                   | 229    | <b>0.0045</b>  | 0.71     | <b>0.0046</b>  | 3.18               | <b>0.0137</b>   |
| STAD            | 191              | 192    | 0.34            | 0.86     | 0.34            | 191                   | 192    | 0.9            | 0.98     | 0.91           | 2.06               | 0.105           |
| TGCT            | 68               | 68     | 0.079           | 6.10E+08 | 1               | 68                    | 68     | 0.94           | 1        | 0.95           | 2.68               | 0.0722          |
| THCA            | 255              | 248    | 0.67            | 1.2      | 0.67            | 255                   | 248    | 0.91           | 1        | 0.91           | 6.23               | <b>0.00037</b>  |
| THYM            | 59               | 59     | 0.18            | 2.8      | 0.2             | 59                    | 59     | 0.15           | 1.9      | 0.16           | -                  | -               |
| UCEC            | 86               | 85     | 0.38            | 0.73     | 0.38            | 86                    | 85     | 0.36           | 0.73     | 0.36           | 1.44               | 0.232           |
| UCS             | 27               | 27     | 0.14            | 0.58     | 0.14            | 27                    | 27     | 0.78           | 0.91     | 0.79           | 0.568              | 0.639           |
| UVM             | 37               | 36     | <b>0.02</b>     | 3.4      | <b>0.028</b>    | 37                    | 36     | <b>0.0016</b>  | 5.9      | <b>0.0052</b>  | -                  | -               |

ACC, adrenocortical carcinoma; BLCA, bladder urothelial carcinoma; BRCA, breast invasive carcinoma; CESC, cervical squamous cell carcinoma and endocervical adenocarcinoma; CHOL, cholangio carcinoma; COAD, colon adenocarcinoma; DLBC lymphoid neoplasm diffuse large B-cell lymphoma; ESCA, esophageal carcinoma; GBM glioblastoma multiforme; HNSC, head and neck squamous cell carcinoma; KICH, kidney chromophobe; KIRC, kidney renal clear cell carcinoma; KIRP, kidney renal papillary cell carcinoma; LAML, acute myeloid leukemia; LGG, lower grade glioma; LIHC, liver hepatocellular carcinoma; LUAD, lung adenocarcinoma; LUSC, lung squamous cell carcinoma; MESO, mesothelioma; OV, ovarian serous cystadenocarcinoma; PAAD pancreatic adenocarcinoma; PCPG, pheochromocytoma and paraganglioma; PRAD prostate adenocarcinoma; READ, rectum adenocarcinoma; SARC, sarcoma; SKCM, skin cutaneous melanoma; STAD, stomach adenocarcinoma; TGCT, testicular germ cell tumors; THCA, thyroid carcinoma; THYM, thymoma; UCEC, uterine corpus endometrial carcinoma; UCS, uterine carcinosarcoma; UVM, uveal melanoma.

**TABLE S3** Correlation analysis between *MIR155HG* and relate markers of immune cells

|                | Gene markers | CHOL  |        | GBM    |        | HNSC  |       | KIRC   |        | LGG    |        | LUAD  |       | SKCM   |        | UVM    |        |
|----------------|--------------|-------|--------|--------|--------|-------|-------|--------|--------|--------|--------|-------|-------|--------|--------|--------|--------|
|                |              | Cor   | P      | Cor    | P      | Cor   | P     | Cor    | P      | Cor    | P      | Cor   | P     | Cor    | P      | Cor    | P      |
| NK cell        | XCL1         | 0.574 | **     | 0.292  | **     | 0.2   | ***   | 0.548  | ***    | 0.359  | ***    | 0.459 | ***   | 0.673  | ***    | 0.324  | *      |
|                | XCL2         | 0.564 | **     | 0.266  | **     | 0.516 | ***   | 0.559  | ***    | 0.395  | ***    | 0.606 | ***   | 0.71   | ***    | 0.4    | **     |
|                | NCR1         | 0.577 | **     | 0.155  | 0.0552 | 0.375 | ***   | 0.284  | ***    | 0.102  | 0.0204 | 0.421 | ***   | 0.482  | ***    | 0.113  | 0.32   |
| Treg cell      | FOXP3        | 0.85  | ***    | 0.136  | 0.0933 | 0.448 | ***   | 0.561  | ***    | -0.011 | 0.802  | 0.612 | ***   | 0.558  | ***    | 0.39   | **     |
| Macrophage     | CD68         | 0.554 | **     | 0.23   | *      | 0.124 | *     | 0.208  | ***    | 0.425  | ***    | 0.453 | ***   | 0.292  | ***    | -0.017 | 0.879  |
|                | CD84         | 0.763 | ***    | 0.075  | 0.357  | 0.395 | ***   | 0.285  | ***    | 0.292  | ***    | 0.543 | ***   | 0.603  | ***    | 0.398  | **     |
|                | CD163        | 0.65  | ***    | 0.268  | **     | 0.354 | ***   | 0.164  | **     | 0.358  | ***    | 0.421 | ***   | 0.509  | ***    | 0.247  | 0.0272 |
|                | MS4A4A       | 0.774 | ***    | 0.271  | **     | 0.447 | ***   | 0.265  | ***    | 0.326  | ***    | 0.496 | ***   | 0.558  | ***    | 0.238  | 0.0337 |
| Dendritic cell | CCL13        | 0.63  | ***    | 0.303  | **     | 0.285 | ***   | 0.113  | *      | 0.039  | 0.373  | 0.393 | ***   | 0.348  | ***    | -0.039 | 0.731  |
|                | CD209        | 0.745 | ***    | -0.043 | 0.599  | 0.265 | ***   | 0.125  | *      | 0.072  | 0.1    | 0.349 | ***   | 0.419  | ***    | 0.234  | 0.0368 |
|                | HSD11B1      | 0.238 | 0.162  | 0.344  | ***    | 0.33  | ***   | 0.172  | ***    | -0.029 | 0.512  | 0.562 | ***   | 0.574  | ***    | 0.189  | 0.0927 |
| Mast cell      | TPSB2        | 0.592 | **     | 0.14   | 0.0845 | 0.154 | **    | 0      | 0.998  | -0.077 | 0.0813 | 0.275 | ***   | 0.097  | 0.0346 | -0.089 | 0.43   |
|                | TPSAB1       | 0.613 | ***    | 0.176  | 0.03   | 0.148 | **    | -0.023 | 0.599  | -0.005 | 0.917  | 0.294 | ***   | 0.114  | 0.0133 | 0.046  | 0.683  |
|                | CPA3         | 0.562 | **     | 0.147  | 0.0706 | 0.111 | 0.011 | -0.084 | 0.0528 | 0.104  | 0.0178 | 0.259 | ***   | 0.161  | **     | 0.037  | 0.746  |
|                | MS4A2        | 0.438 | *      | 0.089  | 0.275  | 0.157 | **    | 0.018  | 0.68   | 0.001  | 0.974  | 0.271 | ***   | 0.181  | ***    | 0.021  | 0.856  |
|                | HDC          | 0.566 | **     | 0.112  | 0.17   | 0.265 | ***   | 0.241  | ***    | 0.231  | ***    | 0.403 | ***   | 0.261  | ***    | 0.116  | 0.306  |
| Th1 cell       | TBX21        | 0.826 | ***    | -0.144 | 0.0757 | 0.667 | ***   | 0.455  | ***    | 0.373  | ***    | 0.691 | ***   | 0.721  | ***    | 0.363  | **     |
| Th2 cell       | GATA3        | 0.782 | ***    | 0.081  | 0.317  | 0.307 | ***   | 0.322  | ***    | 0.436  | ***    | 0.473 | ***   | 0.595  | ***    | 0.346  | *      |
|                | STAT6        | 0.072 | 0.675  | 0.105  | 0.196  | 0.003 | 0.946 | 0.178  | ***    | 0.313  | ***    | 0.027 | 0.542 | -0.085 | 0.0665 | -0.038 | 0.738  |
|                | STAT5A       | 0.476 | *      | 0.157  | 0.053  | 0.478 | ***   | 0.413  | ***    | 0.418  | ***    | 0.573 | ***   | 0.108  | 0.0191 | -0.517 | ***    |
|                | IL13         | 0.099 | 0.567  | -0.034 | 0.672  | 0.368 | ***   | 0.395  | ***    | 0.094  | 0.0328 | 0.292 | ***   | 0.287  | ***    | 0.21   | 0.0617 |
| Th17 cell      | IL17A        | 0.395 | 0.0171 | -0.004 | 0.961  | 0.191 | ***   | 0.13   | *      | 0.07   | 0.11   | 0.315 | ***   | -0.023 | 0.618  | NA     | NA     |
| Tfh cell       | CXCR5        | 0.469 | *      | 0.088  | 0.28   | 0.511 | ***   | 0.412  | ***    | 0.355  | ***    | 0.587 | ***   | 0.559  | ***    | 0.291  | *      |
|                | CXCL13       | 0.719 | ***    | 0.166  | 0.0406 | 0.586 | ***   | 0.636  | ***    | -0.068 | 0.125  | 0.657 | ***   | 0.744  | ***    | 0.425  | ***    |
| PMN-MDSC       | ITGAM        | 0.379 | 0.0233 | 0.226  | *      | 0.375 | ***   | 0.244  | ***    | 0.298  | ***    | 0.483 | ***   | 0.513  | ***    | 0.056  | 0.62   |
|                | CD33         | 0.735 | ***    | 0.294  | **     | 0.468 | ***   | 0.456  | ***    | 0.373  | ***    | 0.576 | ***   | 0.56   | ***    | 0.238  | 0.0336 |
| M-MDSC         | CD14         | 0.54  | **     | 0.34   | ***    | 0.37  | ***   | 0.265  | ***    | 0.34   | ***    | 0.501 | ***   | 0.525  | ***    | 0.179  | 0.112  |

NK cell, natural killer cell; Treg cell, regulatory T cell; Th, T helper cell; Tfh, Follicular helper T cell; PMN-MDSC, polymorphonuclear myeloid-derived suppressor cells; M-MDSC, monocytic myeloid-derived suppressor cells.

\*  $P < 0.01$ ; \*\*  $P < 0.001$ ; \*\*\*  $P < 0.0001$ .

**TABLE S4** Correlation analysis between *MIR155HG* and immunoinhibitors and immunostimulators relate genes

| Gene markers | CHOL   |       | GBM    |        | HNSC   |       | KIRC   |       | LGG    |       | LUAD   |       | SKCM   |       | UVM    |        |
|--------------|--------|-------|--------|--------|--------|-------|--------|-------|--------|-------|--------|-------|--------|-------|--------|--------|
|              | Cor    | P     | Cor    | P      | Cor    | P     | Cor    | P     | Cor    | P     | Cor    | P     | Cor    | P     | Cor    | P      |
| CD160        | -0.042 | 0.81  | -0.077 | 0.35   | 0.478  | ***   | 0.427  | ***   | 0.026  | 0.55  | 0.47   | ***   | 0.505  | ***   | 0.599  | ***    |
| CD96         | 0.837  | ***   | 0.2    | 0.013  | 0.602  | ***   | 0.636  | ***   | 0.471  | ***   | 0.692  | ***   | 0.707  | ***   | 0.416  | **     |
| CSF1R        | 0.54   | **    | 0.088  | 0.28   | 0.404  | ***   | 0.25   | ***   | 0.179  | ***   | 0.489  | ***   | 0.563  | ***   | 0.078  | 0.49   |
| CTLA4        | 0.772  | ***   | 0.11   | 0.175  | 0.656  | ***   | 0.743  | ***   | 0.357  | ***   | 0.788  | ***   | 0.533  | ***   | 0.405  | **     |
| HAVCR2       | 0.74   | ***   | 0.252  | *      | 0.558  | ***   | 0.118  | *     | 0.412  | ***   | 0.639  | ***   | 0.678  | ***   | 0.388  | **     |
| IDO1         | 0.842  | ***   | 0.305  | **     | 0.556  | ***   | 0.251  | ***   | 0.442  | ***   | 0.52   | ***   | 0.676  | ***   | 0.506  | ***    |
| IL10         | 0.627  | ***   | 0.327  | ***    | 0.372  | ***   | 0.356  | ***   | 0.35   | ***   | 0.534  | ***   | 0.574  | ***   | 0.304  | *      |
| IL10RB       | 0.164  | 0.34  | 0.397  | ***    | 0.158  | **    | 0.277  | ***   | 0.473  | ***   | 0.244  | ***   | 0.322  | ***   | 0.453  | ***    |
| KIR2DL1      | 0.143  | 0.41  | 0.01   | 0.9    | 0.323  | ***   | 0.097  | 0.025 | 0.088  | 0.046 | 0.218  | ***   | 0.366  | ***   | 0.15   | 0.18   |
| KIR2DL3      | 0.216  | 0.21  | -0.009 | 0.91   | 0.394  | ***   | 0.143  | **    | 0.136  | *     | 0.308  | ***   | 0.47   | ***   | 0.195  | 0.08   |
| LAG3         | 0.66   | ***   | 0.117  | 0.149  | 0.588  | ***   | 0.681  | ***   | 0.303  | ***   | 0.613  | ***   | 0.694  | ***   | 0.501  | ***    |
| LGALS9       | 0.311  | 0.066 | 0.113  | 0.16   | 0.55   | ***   | 0.433  | ***   | 0.436  | ***   | 0.4    | ***   | 0.553  | ***   | 0.26   | 0.02   |
| PDCD1        | 0.485  | *     | 0.113  | 0.164  | 0.656  | ***   | 0.673  | ***   | 0.507  | ***   | 0.682  | ***   | 0.695  | ***   | 0.476  | ***    |
| TGFB1        | 0.265  | 0.12  | 0.274  | **     | -0.157 | **    | 0.177  | ***   | 0.395  | ***   | 0.34   | ***   | 0.3    | ***   | 0.134  | 0.24   |
| TGFB1        | 0.038  | 0.83  | 0.116  | 0.152  | -0.156 | **    | -0.062 | 0.152 | 0.382  | ***   | 0.126  | *     | 0.016  | 0.73  | 0.29   | *      |
| TIGIT        | 0.898  | ***   | 0.05   | 0.537  | 0.604  | ***   | 0.669  | ***   | 0.105  | 0.018 | 0.743  | ***   | 0.747  | ***   | 0.432  | ***    |
| VTCN1        | -0.027 | 0.874 | -0.284 | **     | 0.07   | 0.108 | -0.139 | *     | -0.143 | *     | -0.016 | 0.724 | -0.153 | **    | 0.237  | 0.0339 |
| CD274        | 0.507  | *     | 0.255  | *      | 0.282  | ***   | 0.116  | *     | 0.28   | ***   | 0.508  | ***   | 0.588  | ***   | 0.342  | *      |
| PDCD1LG2     | 0.76   | ***   | 0.371  | ***    | 0.303  | ***   | 0.373  | ***   | 0.447  | ***   | 0.633  | ***   | 0.67   | ***   | 0.36   | *      |
| BTNL2        | 0.316  | 0.06  | 0.003  | 0.9    | 0.106  | 0.016 | 0.154  | **    | 0.045  | 0.306 | 0.225  | ***   | 0.238  | ***   | 0.094  | 0.407  |
| CD27         | 0.85   | ***   | 0.187  | 0.02   | 0.575  | ***   | 0.657  | ***   | 0.336  | ***   | 0.657  | ***   | 0.695  | ***   | 0.5    | ***    |
| CD28         | 0.772  | ***   | 0.088  | 0.28   | 0.498  | ***   | 0.477  | ***   | 0.354  | ***   | 0.652  | ***   | 0.597  | ***   | 0.314  | *      |
| CD40         | 0.381  | 0.022 | 0.281  | **     | 0.453  | ***   | 0.384  | ***   | 0.42   | ***   | 0.556  | ***   | 0.557  | ***   | 0.011  | 0.93   |
| CD40LG       | 0.737  | ***   | 0.163  | 0.04   | 0.498  | ***   | 0.426  | ***   | 0.373  | ***   | 0.599  | ***   | 0.577  | ***   | 0.28   | 0.012  |
| CD48         | 0.851  | ***   | 0.267  | **     | 0.628  | ***   | 0.536  | ***   | 0.486  | ***   | 0.757  | ***   | 0.715  | ***   | 0.553  | ***    |
| CD70         | 0.888  | ***   | 0.276  | **     | 0.398  | ***   | 0.44   | ***   | 0.337  | ***   | 0.592  | ***   | 0.497  | ***   | 0.32   | *      |
| CXCL12       | 0.288  | 0.089 | 0.034  | 0.68   | 0.249  | ***   | -0.015 | 0.73  | 0.115  | *     | 0.367  | ***   | 0.498  | ***   | 0.164  | 0.15   |
| CXCR4        | 0.804  | ***   | 0.264  | **     | 0.505  | ***   | 0.403  | ***   | 0.371  | ***   | 0.591  | ***   | 0.518  | ***   | 0.39   | **     |
| ICOS         | 0.901  | ***   | 0.153  | 0.058  | 0.553  | ***   | 0.699  | ***   | 0.494  | ***   | 0.774  | ***   | 0.73   | ***   | 0.387  | **     |
| IL6          | 0.507  | *     | 0.356  | ***    | 0.071  | 0.103 | 0.201  | ***   | 0.439  | ***   | 0.232  | ***   | 0.311  | ***   | 0.489  | ***    |
| IL6R         | -0.088 | 0.61  | 0.123  | 0.13   | -0.249 | ***   | -0.041 | 0.35  | 0.238  | ***   | 0.009  | 0.83  | -0.026 | 0.58  | 0.289  | *      |
| LTA          | 0.796  | ***   | -0.085 | 0.3    | 0.61   | ***   | 0.682  | ***   | 0.172  | ***   | 0.751  | ***   | 0.67   | ***   | 0.305  | *      |
| MICA         | -0.006 | 0.97  | 0.405  | ***    | 0.143  | *     | 0.186  | ***   | 0.327  | ***   | 0.147  | **    | -0.092 | 0.047 | -0.058 | 0.61   |
| MICB         | 0.544  | **    | 0.13   | 0.11   | 0.328  | ***   | 0.507  | ***   | 0.387  | ***   | 0.43   | ***   | 0.312  | ***   | 0.241  | 0.031  |
| RAET1E       | 0.131  | 0.445 | 0.026  | 0.75   | -0.102 | 0.02  | -0.099 | 0.02  | 0.152  | **    | 0.11   | 0.012 | 0.134  | *     | 0.234  | 0.037  |
| TMIGD2       | 0.521  | *     | 0.091  | 0.265  | 0.515  | ***   | 0.342  | ***   | 0.003  | 0.944 | 0.6    | ***   | 0.486  | ***   | -0.067 | 0.558  |
| ULBP1        | -0.137 | 0.425 | 0.083  | 0.309  | -0.07  | 0.108 | 0.089  | 0.041 | 0.286  | ***   | 0.055  | 0.22  | 0.135  | *     | 0.521  | ***    |
| CD80         | 0.756  | ***   | 0.141  | 0.0827 | 0.445  | ***   | 0.537  | ***   | 0.455  | ***   | 0.64   | ***   | 0.69   | ***   | 0.379  | **     |
| CD86         | 0.871  | ***   | 0.217  | *      | 0.47   | ***   | 0.418  | ***   | 0.372  | ***   | 0.635  | ***   | 0.699  | ***   | 0.389  | **     |

\*  $P < 0.01$ ; \*\*  $P < 0.001$ ; \*\*\*  $P < 0.0001$ .

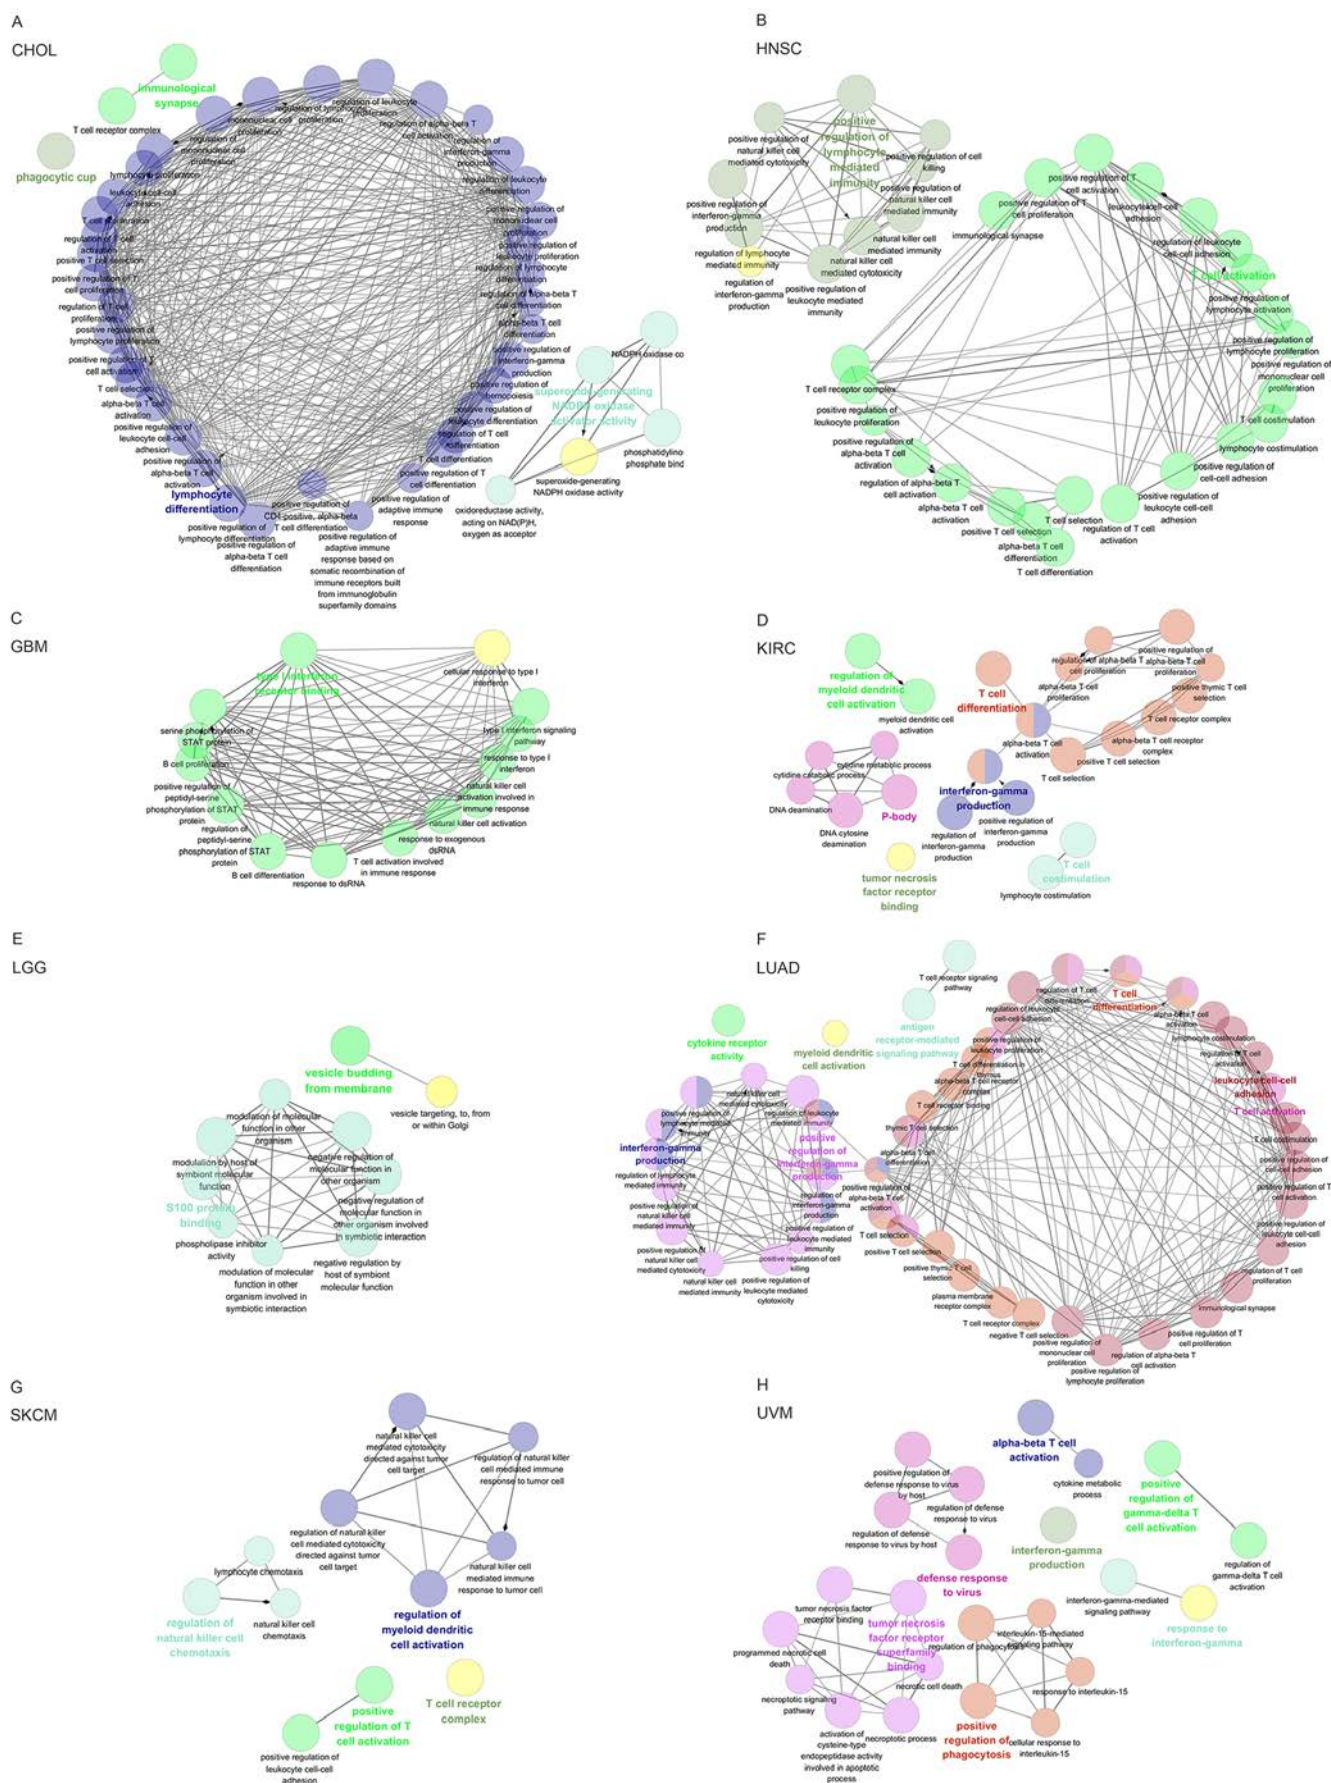

**FIGURE S1** Gene Ontology (GO) analysis of the genes co-expression with *MIR155HG*. GO enrichment the mRNAs those were co-expressed with *MIR155HG* in (A)CHOL, (B)HNSC, (C)GBM, (D)KIRC, (E)LGG, (F)LUAD, (G)SKCM, (H)UVM (show only pathways with  $pV \leq 0.001$ ).

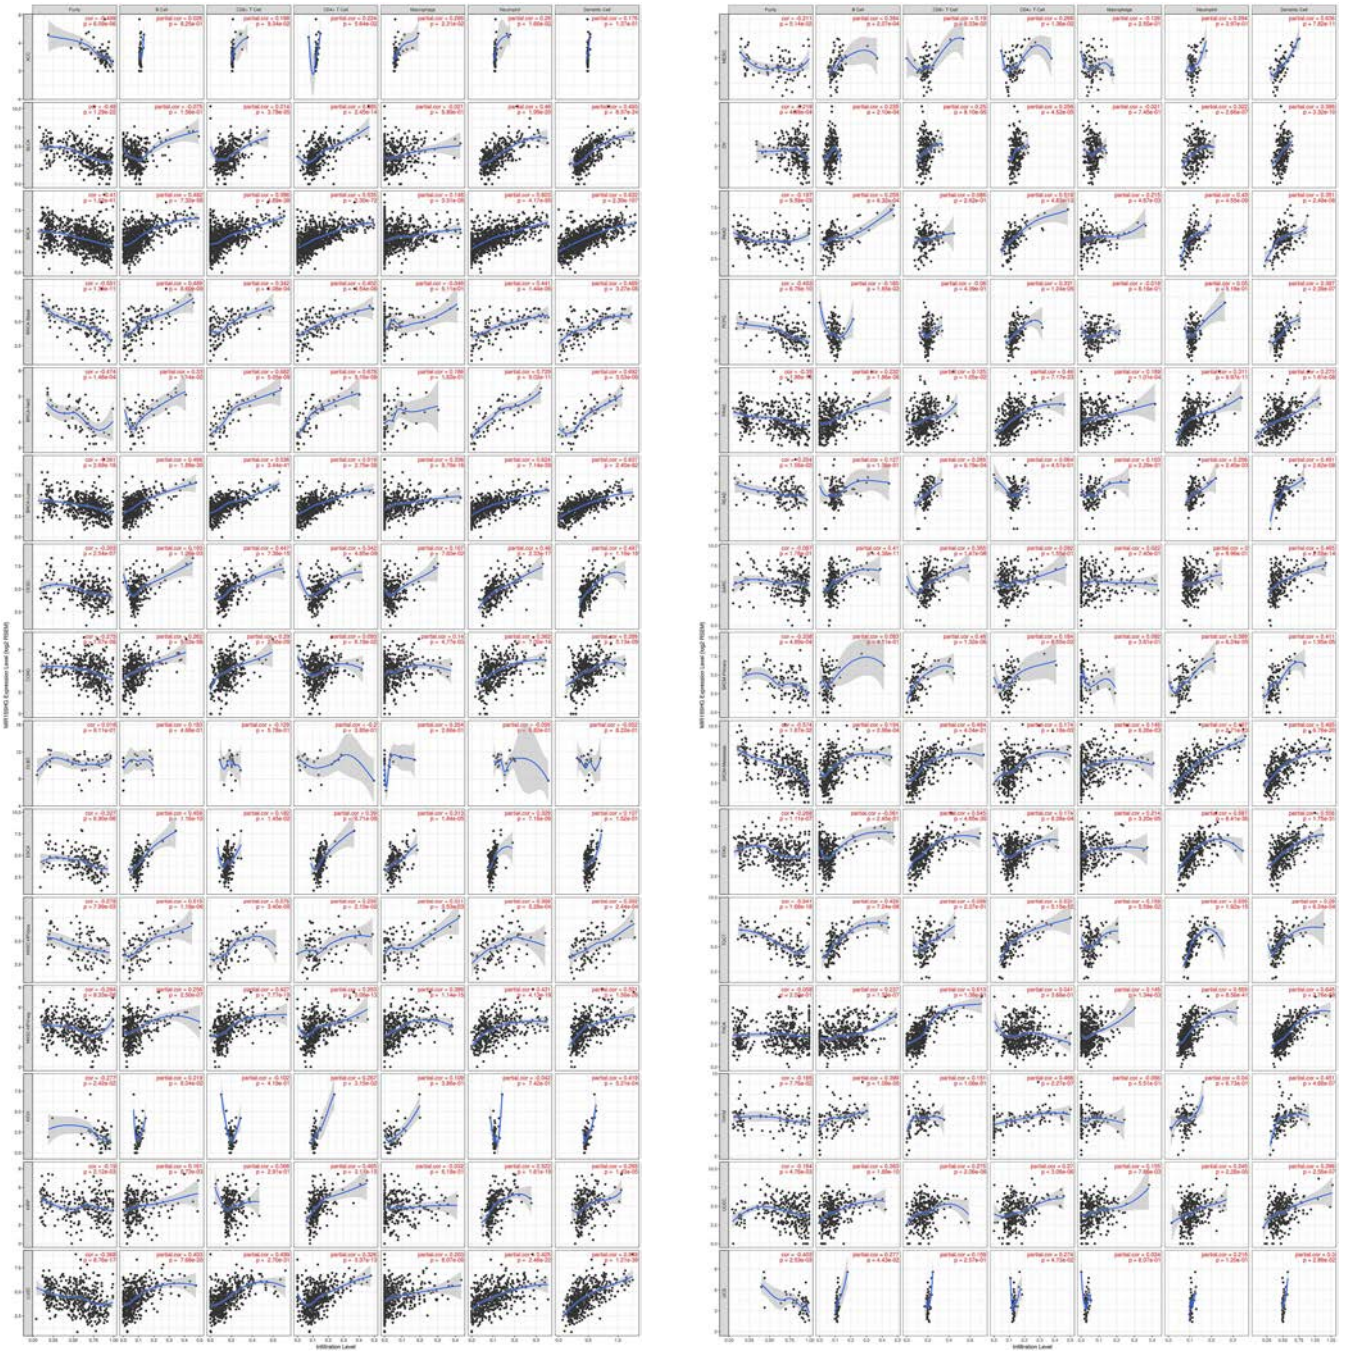

**FIGURE S2** TIMER analysis of the immune cell co-expression with *MIR155HG* in cancers.

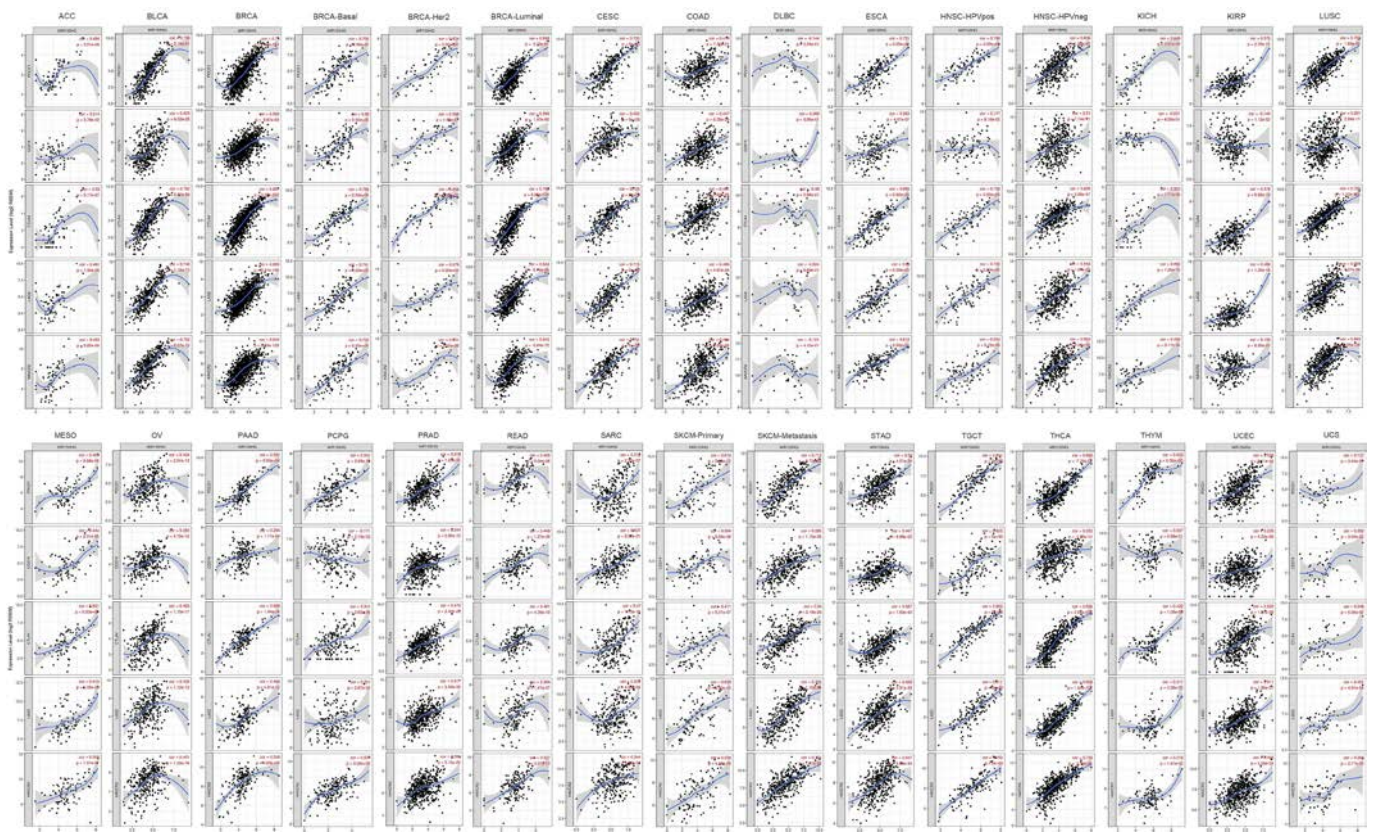

**FIGURE S3** Correlation of *MIR155HG* expression with immune checkpoints molecules in cancers TIMER analysis.
